# Supplementary material for: CDC50A is required for aminophospholipid transport and cell fusion in mouse C2C12 myoblasts
Source: Oxford University Press journal article supplement (doi:10.1242/jcs.258649), 2021-10-19
Supplement: jcs258649supp.pdf [file jcs258649supp.pdf]

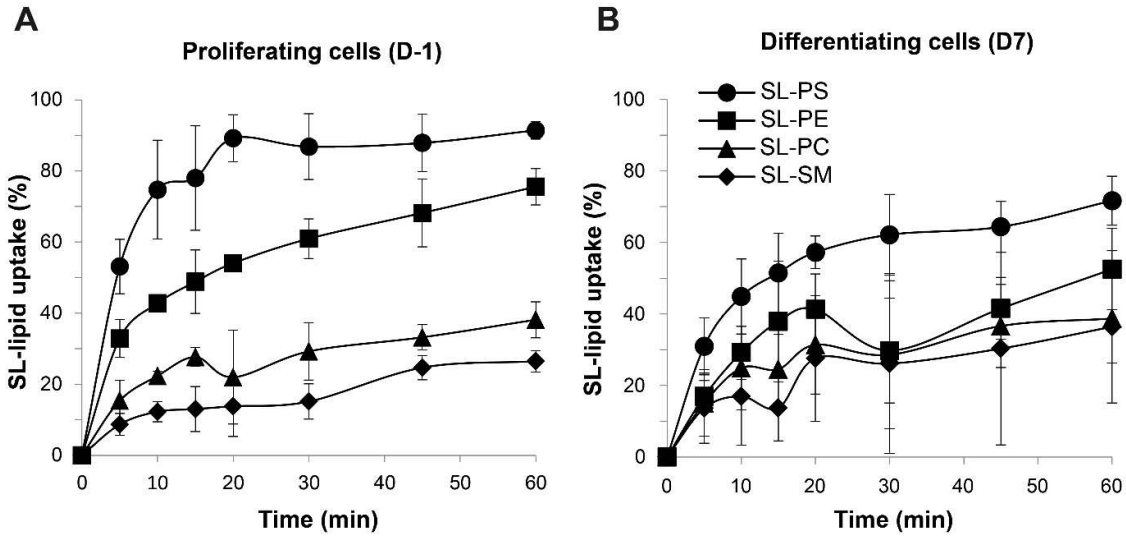

**Fig. S1. Internalization of spin-labeled lipids from the plasma membrane of proliferating and differentiating L6 rat skeletal muscle cells.** Internalization of the indicated spin-labeled (SL) lipids was analyzed during proliferation at D-1(A) and differentiation at day 7 (B) using back-exchange to albumin and expressed as the percentage of total label added at time zero. Data are mean  $\pm$  S.D. from at least two (A) and three (B) independent experiments. PC, phosphatidylcholine; PE, phosphatidylethanolamine; PS, phosphatidylserine; SM, sphingomyelin.

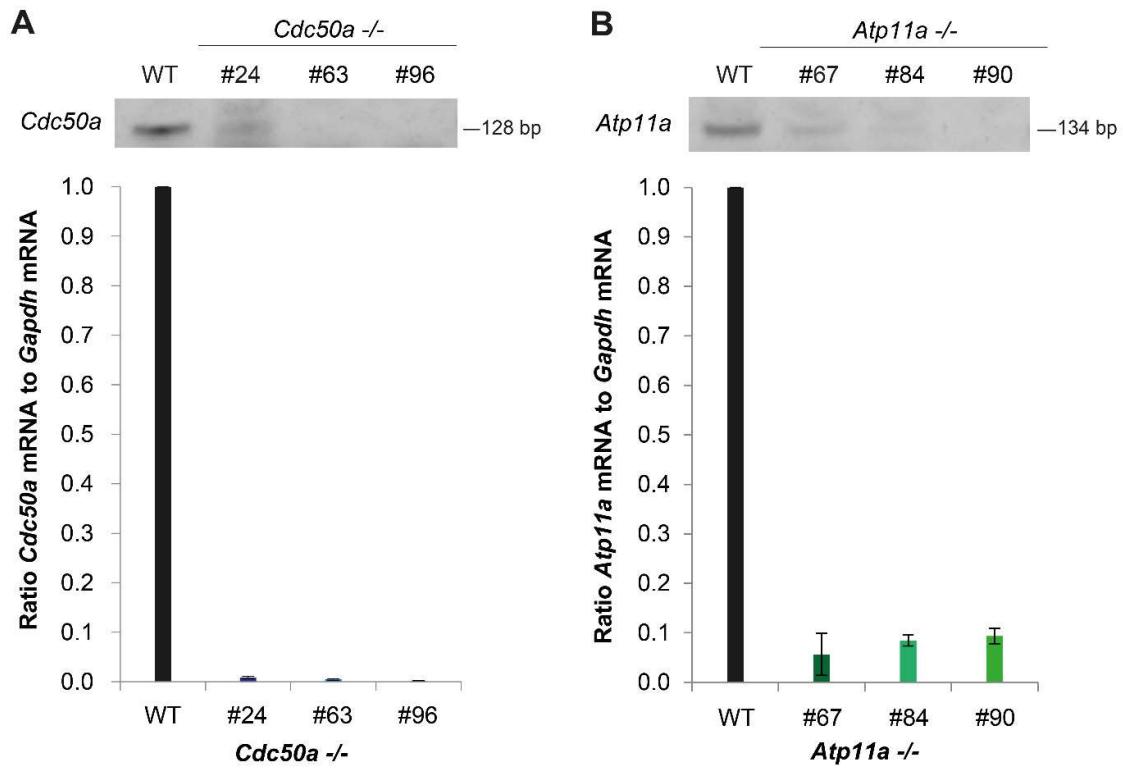

**Fig. S2. Validation of C2C12 knockout cell lines.** Analysis of the mRNA expression of *Cdc50a* and *Atp11a* transcripts in wild-type (WT) and clonal KO isolates by qRT-PCR. Ct values of genes of interest (GOI) were normalized to the housekeeping gene *Gapdh*. Top panels: agarose gel electrophoresis of the RT-PCR products. The experiment was carried out in duplicates and results shown are the mean  $\pm$  S.D. of two independent experiments.

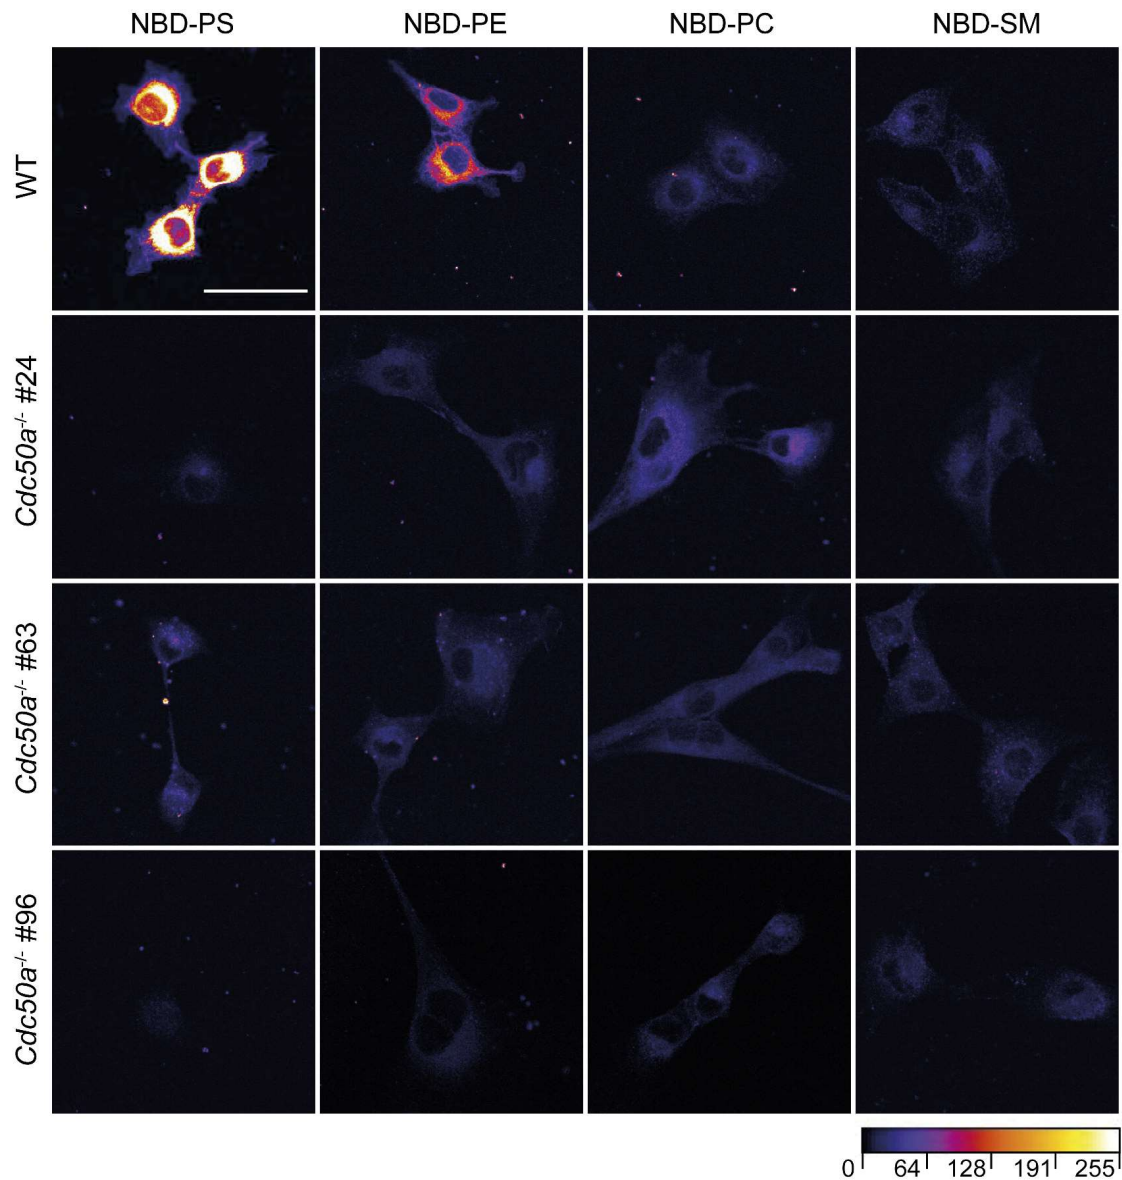

**Fig. S3. CDC50A-deficient C2C12 cells are impaired in aminophospholipid uptake.** Representative confocal images of proliferating wild-type (WT) and CDC50A-deficient cells (lines #24, #63 and #96) labeled with the indicated NBD-lipids for 60 min and subjected to back-exchange with albumin. Images were color-coded with the FIRE look-up-table to highlight intensity variations. In CDC50A-deficient cells, all NBD-lipids were hardly internalized and predominately detected in intracellular punctate structures. Scale bar, 50  $\mu$ m. PC, phosphatidylcholine; PE, phosphatidylethanolamine; PS, phosphatidylserine; SM, sphingomyelin.

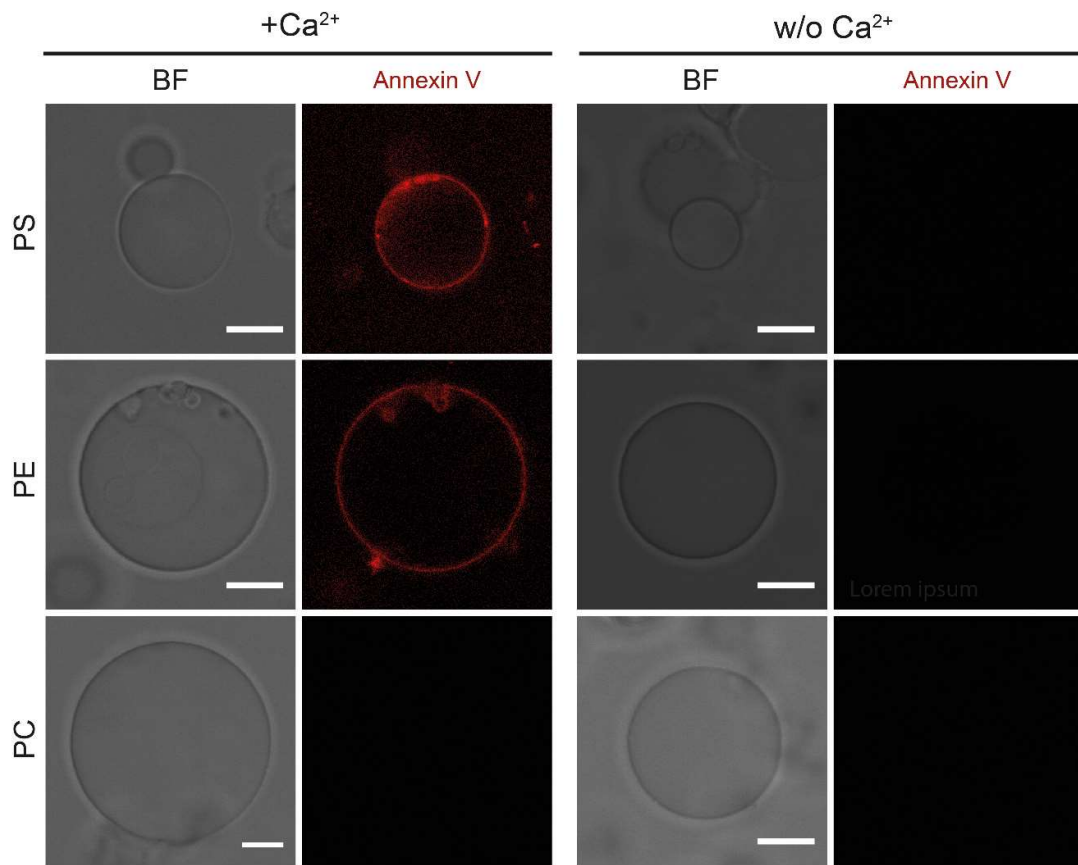

**Fig. S4. Annexin V-Alexa 568 binds PS and PE.** Giant unilamellar vesicles were prepared from different lipids and incubated with Annexin V-Alexa 568 (0.5  $\mu\text{L}/\text{mL}$ ) in the presence or absence of  $\text{Ca}^{2+}$ . Vesicles were analyzed by bright field (BF) and fluorescence microscopy. PC: PC only; PE: PC/PE, (9/1, mol/mol); PS: PC/PS, (9/1, mol/mol). Scale bar, 10  $\mu\text{m}$ .

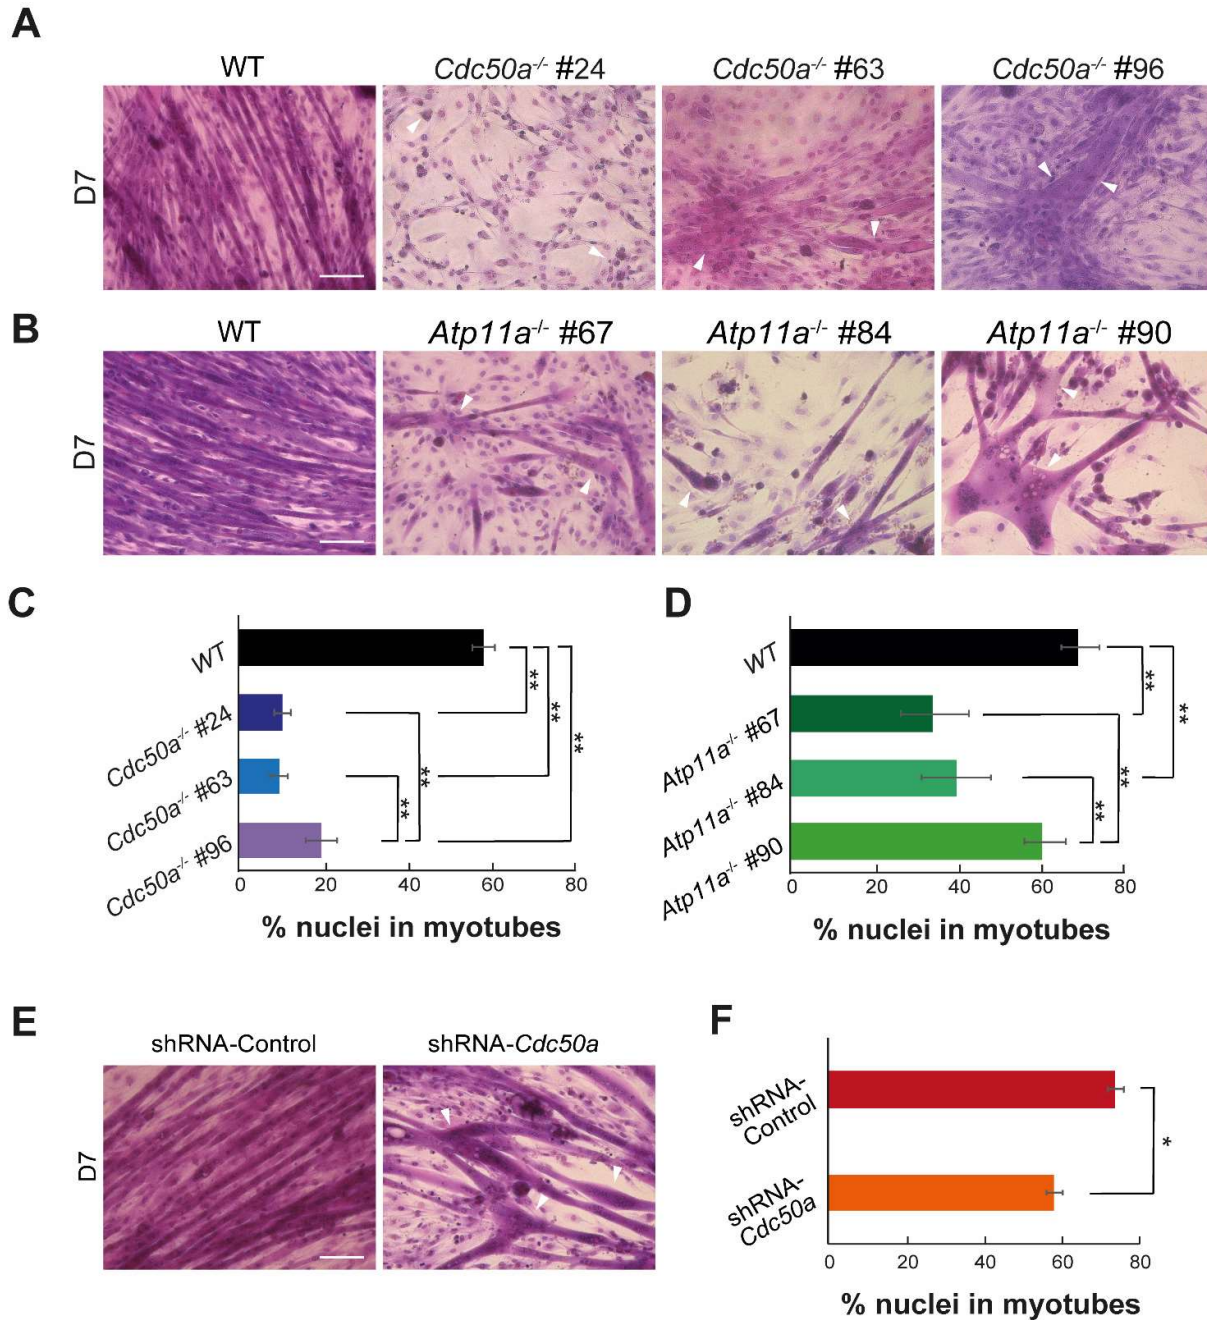

**Fig. S5. High passage C2C12 cells lacking CDC50A or ATP11A are affected in myotube formation.**

A, B, E) Representative microscopy images of wild-type (WT), three independently isolated CDC50A-deficient lines, three independently isolated ATP11A-deficient cell lines, and CDC50A-knockdown cells during differentiation at day 7 (D7). For knockdown, cells were stably transduced with scrambled shRNA control lentivirus or shRNA lentivirus targeted against CDC50A. Scale bars, 100  $\mu$ m. Arrowheads indicate myotubes with abnormal morphology. C, D, F) Fusion index calculated at day 7 of differentiation. Data represents the mean  $\pm$  S.D. of three experiments (ANOVA and TukeyHSD, \*\* $P < 0.01$ ).



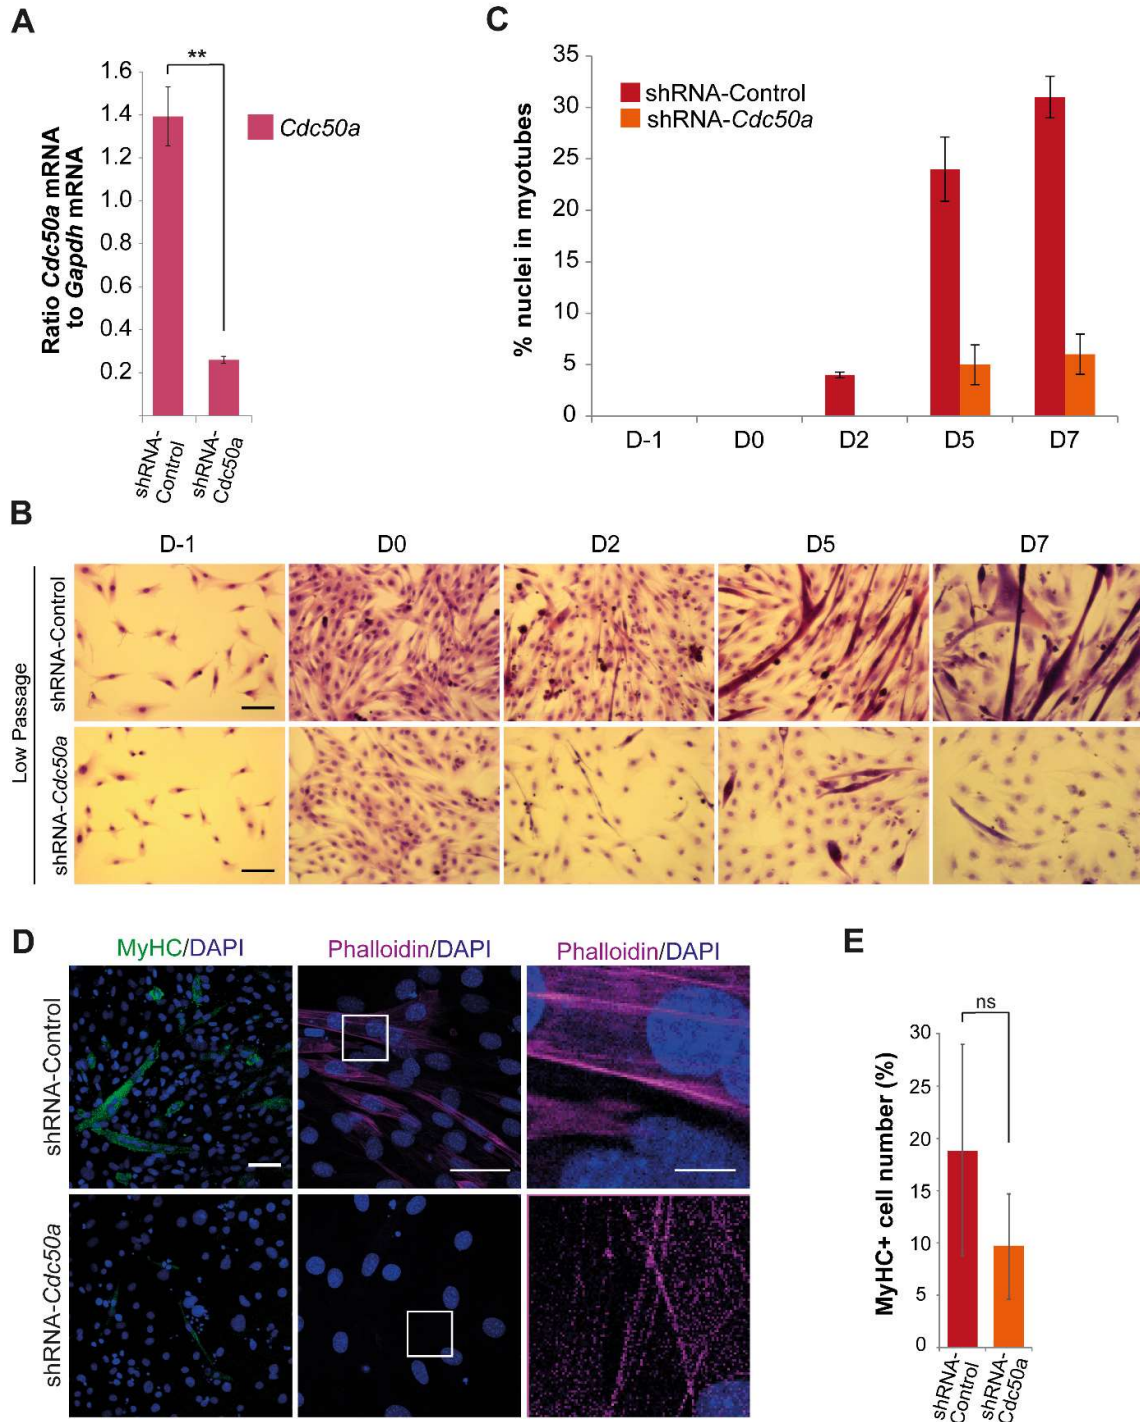

**Fig. S6. Cdc50a knockdown in C2C12 cells impairs myotube formation.** C2C12 cells were transduced with lentivirus carrying shRNA targeting CDC50A (shRNA-CDC50A) or the same amount of lentivirus carrying shRNA-Control. A) qRT-PCR was used to detect the efficiency of shRNA-Cdc50a mediated knockdown in proliferating C2C12 cells. The expression level of Cdc50a in the knockdown cells

was reduced to ~20% of the level in shRNA-Control. Data are presented as mean  $\pm$  S.D. of three experiments (ANOVA and TukeyHSD,  $**P < 0.01$ ). B) Representative microscopy images of low passage control and CDC50A-knockdown cells during proliferation (D-1) and differentiation at days 0 (D0), 2 (D2), 5 (D5) and 7 (D7). Scale bar, 100  $\mu\text{m}$ . C) Calculation of fusion indices showed that shRNA-Cdc50a cells were severely deficient in myotube formation. Data represents the mean  $\pm$  S.D. of two distinct fields of one experiment. D) Confocal imaging of control and CDC50A-knockdown cells immunostained at day 2 of differentiation for MyHC (left panel, green) and F-actin (middle panel, phalloidin, red). Nuclei (DAPI) are in blue. Right panels show zoomed-in images of the white boxes, adjusted with different tonal values, brightness and contrast, in order to enhance the low signal intensities. Scale bars: 50  $\mu\text{m}$  (left and middle panels), 10  $\mu\text{m}$  (right panel). E) Percentage MyHC-positive cells at day 2 of differentiation. Bars indicate S.D. from the mean of two independent experiments (ANOVA and TukeyHSD; ns, not significant).

**Table S1.** Cell media and material

| <b>Product</b>                                     | <b>Company</b>       | <b>Catalogue number</b> |
|----------------------------------------------------|----------------------|-------------------------|
| Dulbeccos's Modified Eagle's Medium - high glucose | Sigma-Aldrich        | D6046-500ML             |
| Dulbeccos's Modified Eagle's Medium - low glucose  | Sigma-Aldrich        | D6046-500ML             |
| Fetal Bovine Serum                                 | Capricorn Scientific | FBS-12A                 |
| Horse serum                                        | Sigma-Aldrich        | F9665-100ML             |
| Penicilin/Streptomycin                             | Sigma-Aldrich        | P0781-100ML             |
| Trypsin                                            | Sigma-Aldrich        | T4549-100ML             |
| Glutamin                                           | Sigma-Aldrich        | G7513-100ML             |
| T-25 flasks                                        | Sarstedt             | 83.3910                 |
| T-75 flasks                                        | Sarstedt             | 83.3911                 |
| 35 mm Petri dishes                                 | Ibidi                | 81156                   |
| Hanks' Balanced Salt Solution                      | Sigma-Aldrich        | H6648-500ML             |
| Duclbecco's Phosphate Buffered Saline              | Sigma-Aldrich        | D8537-500ML             |
| Goat serum                                         | SouthernBiotech      | 0060-01                 |
| DAPI                                               | Sigma-Aldrich        | D9524-5MG               |
| Bovine Serum Albumin                               | Sigma-Aldrich        | A7030-50G               |
| Triton X-100                                       | Roth                 | 3051.3                  |



**Table S2.** Primers used for PCR

| Target              | Type | Primer sequence            | Amplicon size |
|---------------------|------|----------------------------|---------------|
| <i>Cdc50a</i> WT.A  | Fwd  | GACCCTAGTGCTTTGCTTGTAAGT   | 590 bp        |
|                     | Rv   | CACTATGGAAAGCTCAACAGTCAG   |               |
| <i>Cdc50a</i> HDR.A | Fwd  | GTTGCTACTTAACCTCAGTAC      | 463 bp        |
|                     | Rv   | CTACTGCACTTATATACGGTTC     |               |
| <i>Cdc50a</i> WT.C  | Fwd  | CCTATGCCTTCTCTGTCAGC       | 306 bp        |
|                     | Rv   | CTTTTAGACAAGAAGGGATATTGATC |               |
| <i>Cdc50a</i> HDR.C | Fwd  | CTTCCATTTCTTGCTTAG         | 387 bp        |
|                     | Rv   | GTGAAGGAGAGATGCGAG         |               |
| <i>Atp11a</i> WT.A  | Fwd  | GTCTCAACCTGACGGTGTTG       | 504 bp        |
|                     | Rv   | GACTCCATCTCCACATCCTG       |               |
| <i>Atp11a</i> HDR.A | Fwd  | GTCTCAACCTGACGGTGTTG       | 387 bp        |
|                     | Rv   | GCACTTATATACGGTTCTCCC      |               |
| <i>Atp11a</i> WT.B  | Fwd  | GAAACATAAGGCAGCCTAAAC      | 308 bp        |
|                     | Rv   | GGCAAACCTGCTTTGAAAAG       |               |
| <i>Atp11a</i> HDR.B | Fwd  | GAAACATAAGGCAGCCTAAAC      | 434 bp        |
|                     | Rv   | GCGAAAAAGAACG TTCACG       |               |
| <i>Atp11a</i> WT.C  | Fwd  | GTTGCTAGGTGTTTCCAGG        | 408 bp        |
|                     | Rv   | GCCCTTAACTGTCAGACTACAC     |               |
| <i>Atp11a</i> HDR.C | Fwd  | GTTGCTAGGTGTTTCCAGG        | 416 bp        |
|                     | Rv   | GTGAAGGAGAGATGCGAGC        |               |

**Table S3.** Primers used for RT-PCR

| Target        | Type | Primer sequence          | Amplicon size |
|---------------|------|--------------------------|---------------|
| <i>Atp8a1</i> | Fwd  | TGAGAGATCGTGCAGAAAGGAG   | 155 bp        |
|               | Rv   | GGGCTTTCAGTGGGAACCAAAC   |               |
| <i>Atp8a2</i> | Fwd  | GCGTACTTCTGGTTGGGATTG    | 166 bp        |
|               | Rv   | CGTACTGTCTCGAAGCATCG     |               |
| <i>Atp8b1</i> | Fwd  | CAATTTTCGGCAGCATCGCACTG  | 137 bp        |
|               | Rv   | CAGCCAGATGTATGGCTGTCTC   |               |
| <i>Atp8b2</i> | Fwd  | GACACAATCCTGCTAGACAGGC   | 150 bp        |
|               | Rv   | GGCCACTCCTCATAGTACTCTTC  |               |
| <i>Atp8b3</i> | Fwd  | ACTACGAGCCACTGGACATGC    | 162 bp        |
|               | Rv   | CGTCTGAATCATAGATGCAGCC   |               |
| <i>Atp8b4</i> | Fwd  | GGCCACATCATTGGTCATTGTGG  | 140 bp        |
|               | Rv   | AGACACCATCACTGTGCATGGC   |               |
| <i>Atp8b5</i> | Fwd  | CTAGTGCAGACGACTCTGATTGG  | 166 bp        |
|               | Rv   | AGATGCTGGGGTACCTGAGACAC  |               |
| <i>Atp9a</i>  | Fwd  | GGCCACTGTCCTACAAGACGTTTC | 160 bp        |
|               | Rv   | GCCACCATCAGTAGCTCAGTGAG  |               |
| <i>Atp9b</i>  | Fwd  | ACCCTGTTACGCCAGCATAACC   | 169 bp        |
|               | Rv   | TGCCGATGTGTCTGAACTGTG    |               |
| <i>Atp10a</i> | Fwd  | GTGGATGCTGCCTTTCAAAGCC   | 138 bp        |
|               | Rv   | AATACCCAGGTGCAGCAGGAAG   |               |
| <i>Atp10b</i> | Fwd  | CAGTACCAATGTCTGTCCTTCCC  | 146 bp        |
|               | Rv   | CACCTCCCCACAGATCTTTGTCG  |               |
| <i>Atp10d</i> | Fwd  | CCTCACCTTCTGGATCACCTTG   | 161 bp        |
|               | Rv   | CAATCACCAGGTGGAGGAGAATG  |               |

|               |     |                           |        |
|---------------|-----|---------------------------|--------|
| <i>Atp11a</i> | Fwd | GCTGACCTTTGATTCTGTGCGG    | 142 bp |
|               | Rv  | TCTAGACCGGACCTGGTCTAC     |        |
| <i>Atp11b</i> | Fwd | GGACCAGCTTATCTCTTGCACTCAG | 168 bp |
|               | Rv  | CATCACCAACAGCCAGTGTTATCGG |        |
| <i>Atp11c</i> | Fwd | GAAACTGCTATTGGTTCATGGA    | 143 bp |
|               | Rv  | CATAGAGTGGCTGTTGTGAG      |        |
| <i>Cdc50a</i> | Fwd | GCCAGTAAACTGGCATAAGGCAG   | 159 bp |
|               | Rv  | GGGTGTAAATCATCTCTCCGCTC   |        |
| <i>Cdc50b</i> | Fwd | CTACCACGTCAAGTTCGCAAC     | 160 bp |
|               | Rv  | CATCCACACCACGAAGTCCTG     |        |
| <i>Cdc50c</i> | Fwd | CCTCCGGAGAAAATGGAGGG      | 173 bp |
|               | Rv  | TGATGGGAGTGTCATTGTGGG     |        |
| <i>Gapdh</i>  | Fwd | CATCACTGCCACCCAGAAGACTG   | 153 bp |
|               | Rv  | ATGCCAGTGAGCTTCCCGTTCAG   |        |

| Knockout analysis by RT-PCR |     |                          |        |
|-----------------------------|-----|--------------------------|--------|
| <i>Cdc50a</i> mRNA          | Fwd | GGCAGTATATGAGCTAGACCCTGA | 128 bp |
|                             | Rv  | CTCTCCGCTCTATGAGACGATAC  |        |
| <i>Atp11a</i> mRNA          | Fwd | CATATCCATGCTGTCCAGTGGG   | 134 bp |
|                             | Rv  | CATCGGCCAATGCTTTGAGTC    |        |
| Housekeeping gene           |     |                          |        |
| <i>Gapdh</i>                | Fwd | CATCACTGCCACCCAGAAGACTG  | 153 bp |
|                             | Rv  | ATGCCAGTGAGCTTCCCGTTCAG  |        |
